# Supplementary material for: Prevalence of Diabetes and High Risk for Diabetes Using A1C Criteria in the U.S. Population in 1988–2006
Source: Oxford University Press journal article supplement (doi:10.2337/dc09-1524), 2010-01-13
Supplement: dc09-1524_online_appendix.pdf [file dc09-1524_online_appendix.pdf]

Table A1. Standardized prevalence of undiagnosed diabetes, total diabetes, and high risk/prediabetes using three different criteria (A1c, FPG, and 2-hour PG from an OGTT), by age, sex, and race/ethnicity—NHANES 2003-2006 and 2005-2006\*

|                                  | Undiagnosed diabetes |                 |                 | Total diabetes<br>(previously diagnosed<br>and undiagnosed) |                     | High Risk or Prediabetes |                  |                  |
|----------------------------------|----------------------|-----------------|-----------------|-------------------------------------------------------------|---------------------|--------------------------|------------------|------------------|
|                                  | A1c                  | FPG             | 2-hour PG       | A1c                                                         | FPG or<br>2-hour PG | A1c                      | IFG              | IGT              |
| Combined age groups (yrs)        |                      |                 |                 |                                                             |                     |                          |                  |                  |
| ≥20                              | 1.8 (1.4-2.2)        | 2.4 (1.4-3.5)   | 4.8 (3.5-6.1)   | 9.3 (8.6-10.1)                                              | 12.6 (10.9-14.3)    | 3.4 (3.0-3.8)            | 25.2 (22.4-28.1) | 13.6 (11.5-15.8) |
| ≥65                              | 3.5 (2.6-4.4)        | 6.6 (2.7-10.5)  | 14.1 (9.5-18.7) | 21.2 (18.8-23.6)                                            | 31.4 (25.3-37.4)    | 8.1 (6.6-9.6)            | 36.9 (32.1-41.7) | 27.1 (21.2-32.9) |
| Age-specific groups (yrs)        |                      |                 |                 |                                                             |                     |                          |                  |                  |
| 20-39                            | 0.6 (0.3-0.9)        | 0.7† (0.2-1.3)  | 0.9 (0.4-1.4)   | 2.5 (1.9-3.1)                                               | 3.1 (2.4-3.8)       | 0.7 (0.4-1.0)            | 12.9 (10.1-15.7) | 7.4 (4.6-10.1)   |
| 40-59                            | 2.0 (1.3-2.7)        | 1.9† (0.4-3.4)  | 4.2 (1.8-6.5)   | 10.1 (8.7-11.5)                                             | 12.4 (9.0-15.8)     | 3.7 (3.1-4.4)            | 31.2 (24.3-38.2) | 13.3 (9.1-17.5)  |
| 60-74                            | 3.5 (2.1-4.9)        | 6.8† (2.0-11.5) | 12.4 (6.6-18.3) | 21.1 (18.8-23.5)                                            | 29.9 (22.9-37.0)    | 7.1 (5.5-8.8)            | 38.2 (32.0-44.4) | 21.8 (15.8-27.7) |
| ≥75                              | 3.6 (2.4-4.8)        | 5.7† (1.4-10.0) | 13.2 (9.3-17.2) | 18.6 (16.6-20.7)                                            | 28.8 (24.6-32.9)    | 8.7 (7.2-10.2)           | 35.6 (31.0-40.2) | 34.7 (25.6-43.8) |
| Sex (age ≥20 yrs)                |                      |                 |                 |                                                             |                     |                          |                  |                  |
| Men                              | 2.1 (1.5-2.7)        | 3.4 (1.5-5.3)   | 5.0 (3.0-6.9)   | 9.7 (8.8-10.6)                                              | 12.6 (10.1-15.0)    | 3.6 (3.1-4.1)            | 31.9 (27.3-36.5) | 14.7 (12.0-17.4) |
| Women                            | 1.5 (1.2-1.8)        | 1.6† (0.5-2.6)  | 4.6 (3.1-6.0)   | 9.1 (8.1-10.1)                                              | 12.5 (10.3-14.8)    | 3.2 (2.6-3.9)            | 19.0 (16.9-21.0) | 12.8 (9.8-15.8)  |
| Race/Ethnicity<br>(age ≥ 20 yrs) |                      |                 |                 |                                                             |                     |                          |                  |                  |
| Non-Hispanic White               | 1.3 (0.9-1.8)        | 2.3 (0.9-3.7)   | 4.9 (3.1-6.6)   | 7.6 (6.7-8.5)                                               | 11.0 (8.8-13.2)     | 2.7 (2.3-3.2)            | 24.0 (20.6-27.4) | 13.5 (10.9-16.2) |
| Non-Hispanic Black               | 2.7 (2.2-3.3)        | 3.5 (2.3-4.7)   | 4.1 (2.9-5.3)   | 14.9 (13.4-16.5)                                            | 18.7 (17.0-20.4)    | 7.2 (6.2-8.2)            | 20.9 (17.3-24.5) | 10.1 (7.1-13.1)  |
| Mexican American                 | 3.6 (2.3-4.9)        | 3.7 (1.9-5.5)   | 7.0 (4.7-9.3)   | 15.6 (14.2-16.9)                                            | 20.1 (15.9-24.2)    | 3.6 (2.5-4.6)            | 27.8 (20.3-35.4) | 14.4 (10.6-18.1) |

Data are % (95% CI).

Previously diagnosed diabetes determined by self-report on interview.

Values by age alone and sex include those of race/ethnic groups not listed separately.

Estimates for the total population aged ≥20 years and for race/ethnic groups were age and sex standardized, estimates for age-specific groups including those aged ≥65 years were sex standardized, and estimates for sex groups were age standardized (all using the 2000 U.S. Census population).

\*A1c is based on NHANES 2003-2006; FPG and 2-hour PG from an OGTT is based on NHANES 2005-2006 from reference 8.

†Relative SE >30%: the confidence interval is wide, relative to the size of the estimate.
